# Supplementary material
Source: publisher figshare collection journal article supplement (https://sage.figshare.com/ndownloader/files/16118057)
Supplement: Supplementary file 1 [file 16118057]

## **Supporting Information**

### **A New Aurone from the Seeds of *Psoralea Corylifolia* with Their Diacylglycerol Acyltransferase Inhibitory Activity**

**Bo Ren<sup>a</sup>, Jia-Yue Dong<sup>a</sup>, Ying Liu<sup>b,c\*</sup>**

*<sup>a</sup>College of Pharmacy, Chengdu University of Traditional Chinese Medicine, Sichuan  
Province, 610041, China*

*<sup>b</sup>Department of Pediatrics, West China Second Hospital of Sichuan University,  
Sichuan Province, 610041, China*

*<sup>c</sup>Key Laboratory of Birth Defects and Related Diseases of Women and Children  
(Sichuan University), Ministry of Education, Sichuan Province, 610041, China*

E-mail: *liuyingdream@163.com*

**Figure Legends:**

**Fig. 1**  $^1\text{H}$ -NMR spectrum of compound **1** (acetone- $d_6$ , 500 MHz)

**Fig. 2**  $^{13}\text{C}$ -NMR spectrum of compound **1** (acetone- $d_6$ , 125 MHz)

**Fig. 3** HMBC spectrum of compound **1** (acetone- $d_6$ )

**Fig. 4** HRESIMS spectrum of compound **1**

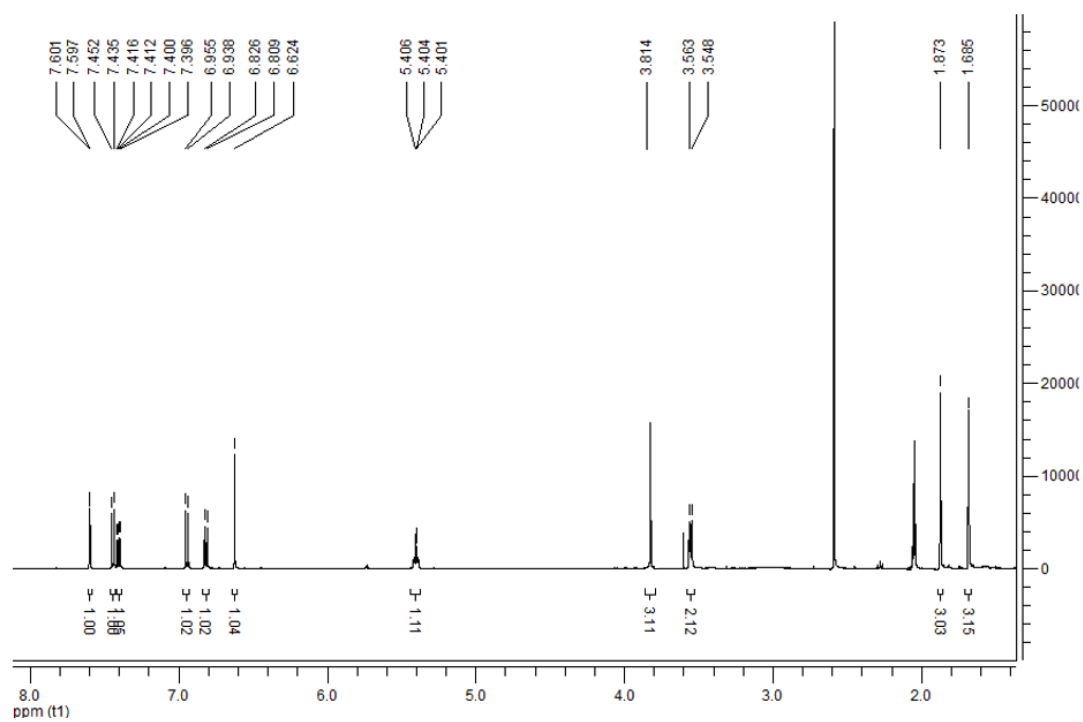

**Fig.1** <sup>1</sup>H-NMR spectrum of compound **1** (acetone-*d*<sub>6</sub>, 500 MHz)

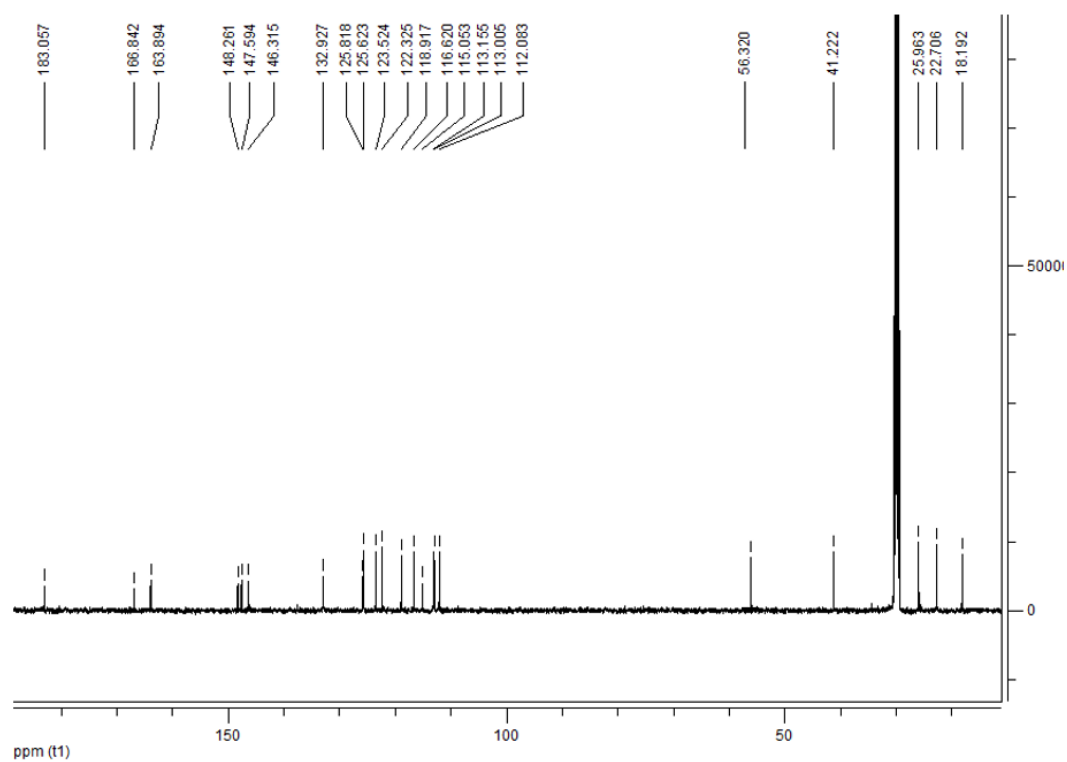

**Fig.2** <sup>13</sup>C-NMR spectrum of compound **1** (acetone-*d*<sub>6</sub>, 125 MHz)

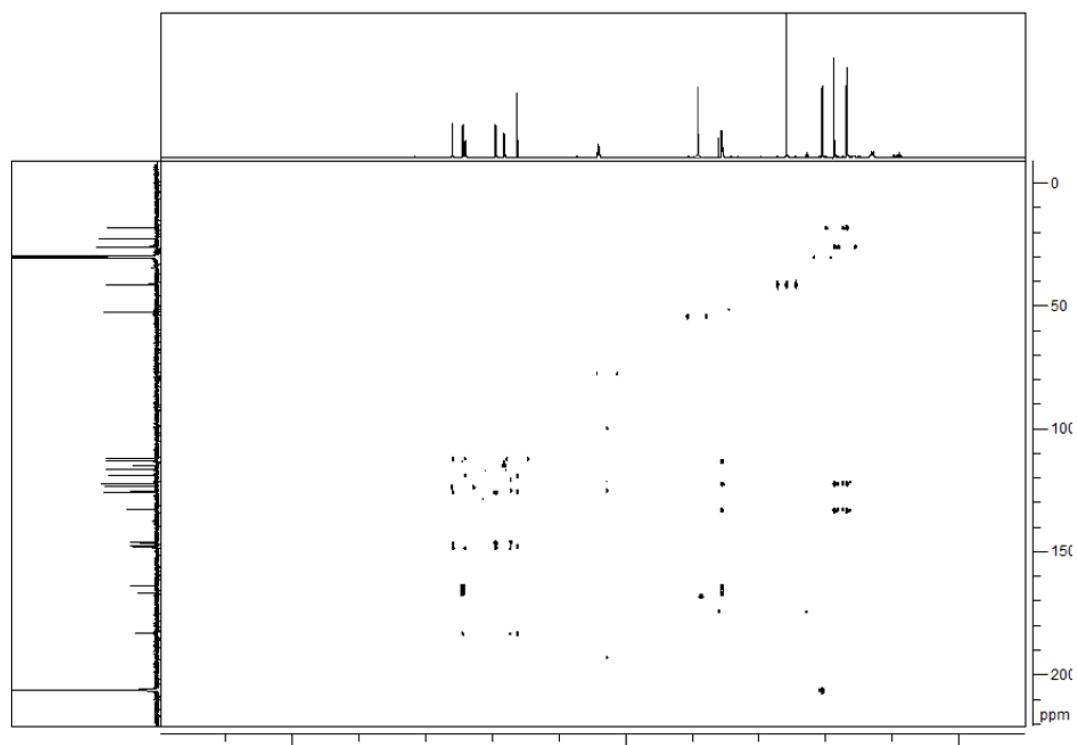

**Fig.3** HMBC spectrum of compound **1** (acetone- $d_6$ )

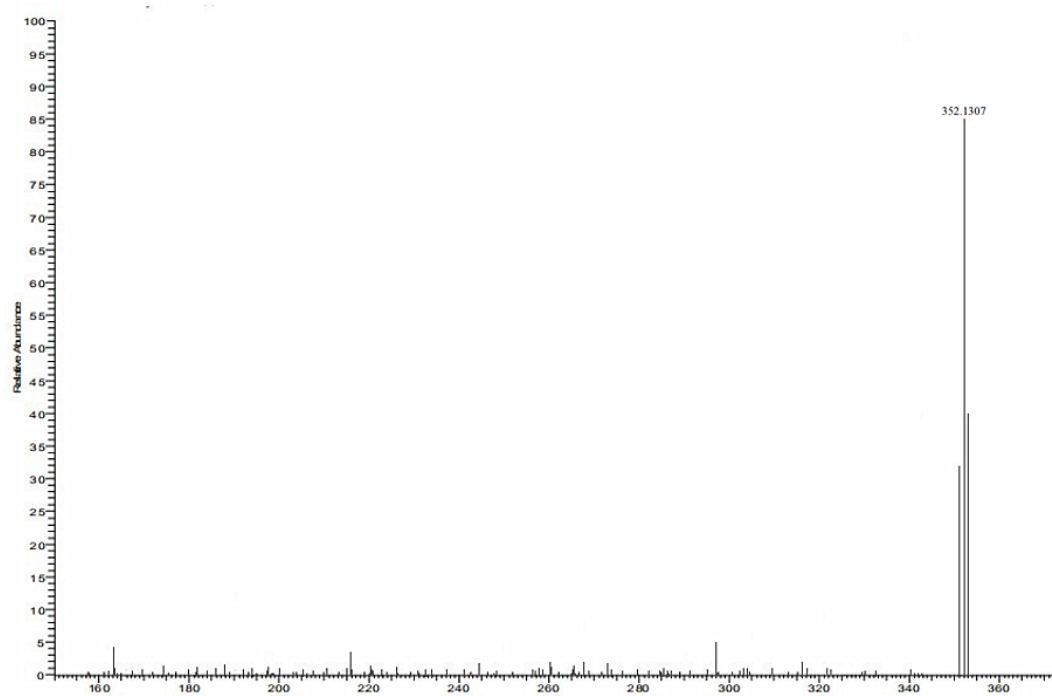

**Fig.4** HREIMS spectrum of compound **1**
